# Supplementary material for: Evolutionary Divergence of Marinobacter Strains in Cryopeg Brines as Revealed by Pangenomics
Source: Front Microbiol. 2022 Jun 6;13:879116. doi: 10.3389/fmicb.2022.879116 (PMC9207381; doi:10.3389/fmicb.2022.879116)
Supplement: Supplementary file 2 [file Table_1.XLSX]

## Sheet: Sheet1
Table 1. Genomes used in this study, their references, accession numbers, and environments of isolation.
ID	Clade	Genome	Isolation environment	Isolation environment, brief	Latitude	Longitude	RefSeq accession	Reference
1	I	bohaiensis	benthic sediment; Jiaozhou Bay, Bohai Sea; China	sediment	36.0722	120.308	GCF_003258515.1	Xu et al. 2018
2	I	changyiensis	sea sediment; Changyi of Shandong Province; China	sediment	37.1329	119.431	GCF_009193265.1	Li et al. 2020
3	I	daqiaonensis	﻿sediment; Daqiao salt pond; Yellow Sea; east coast of China	sediment	35.9896	120.303	GCF_012070355.1	Qu et al. 2011
4	I	fonticola	marine sediments; South China Sea; China	sediment	22.12	119.29	GCF_008122265.1	Sun et al. 2020
5	I	mobilis	﻿sediment; Dayu Bay; East China Sea (Lat. 27.33, Long. 120.57)	sediment	20.3325	120.575	GCF_900106945.1	Huo et al. 2008
6	I	nanhaiticus	isolated from an phenanthrene-degrading consortium, enriched from sediment of the South China Sea; China	sediment	19.977	111.421	GCF_000364845.1	Cui et al. 2013; Gao et al. 2013
7	I	profundi	deep-sea sediment sample from the New Britain Trench, Solomon Sea; Pacific Ocean	sediment	-6.6	149.8	GCF_002744715.1	Cao et al. 2019
8	I	salicampi	﻿sediment; marine solar saltern; Yellow Sea; Korea	sediment	35.68	126.53	GCF_011074795.1	Yoon et al. 2007
9	I	segnicrescens	﻿benthic sediment; 1161m depth; South China Sea	sediment	15	114	GCF_900111555.1	Guo et al. 2007
10	I	zhejiangensis	﻿sediment; Dayu Bay; East China Sea (Lat. 27.33, Long. 120.57)	sediment	20.3325	120.575	GCF_900114775.1	Huo et al. 2008
11	II	algicola	﻿dinoflagellate Gymnodinium catenatum; Yellow Sea; Korea	protist-host	35.4	123.8	GCF_000170835.1	Green et al. 2006
12	II	confluentis	estuary between freshwater lake and ocean; Hwajinpo; South Korea	estuary	38.4803	128.438	GCF_008795935.1	Park et al. 2015
13	II	halotolerans	saltern (possible); Jeungdo; South Korea	saltern	35.5953	126.612	GCF_008795985.1	Kim et al. 2017
14	II	lipolyticus	﻿saline soil; seaside city of Cádiz; Spain	saltern	36.5	-6.25	GCF_000397065.2	Papke et al. 2013
15	II	salarius	seawater; Russia	seawater	42.9039	132.35	GCF_002116735.1	Ng et al. 2014
16	II	vulgaris	solar saltern; Shandong, China	saltern	36.8296	122.01	GCF_007559285.1	Zhang et al. 2019
17	III	gelidimuriae	Blood Falls, Taylor Glacier, Antarctica	subzero brine	-77.7179	162.281	GCF_000372805.1	Chua et al. 2018
18	III	M1C^1	cryopeg brine, Utqiaġvik, Alaska	subzero brine	71.2944	-156.715
19	III	M2C^1	cryopeg brine, Utqiaġvik, Alaska	subzero brine	71.2944	-156.715
20	III	M3C^1	cryopeg brine, Utqiaġvik, Alaska	subzero brine	71.2944	-156.715
21	III	M4C^1	cryopeg brine, Utqiaġvik, Alaska	subzero brine	71.2944	-156.715
22	III	CB1^2	cryopeg brine, Utqiaġvik, Alaska	subzero brine	71.2944	-156.715
23	III	CBIA^2	cryopeg brine, Utqiaġvik, Alaska	subzero brine	71.2944	-156.715
24	III	CBIW17^2	cryopeg brine, Utqiaġvik, Alaska	subzero brine	71.2944	-156.715
25	III	CBIW18^2	cryopeg brine, Utqiaġvik, Alaska	subzero brine	71.2944	-156.715
26	III	psychrophilus	﻿sea ice; Canadian Basin; Arctic Ocean	subzero brine	70.3872	-140.115	GCF_001043175.1	Zhang et al. 2008
27	IV	antarcticus	﻿intertidal sandy sediment; Larsemann Hills; Antarctica	sediment	-69.3717	76.3742	GCF_900142385.1	Liu et al. 2012
28	IV	aromaticivorans	sediment; South China Sea; China	sediment	19.977	111.421	GCF_002806975.1	Cui et al. 2016
29	IV	maritimus	﻿seawater; 110 km SW of subantarctic Kerguelen islands	seawater	-50.6667	68.4167	GCF_007671675.1	Shivaji et al. 2005
30	IV	piscensis	salty foods samples - anchovies; Tunisia/Mediterranean Sea	food	36.8	10.2	GCF_007671655.1	Hedi et al. 2015
31	IV	salexigens	sediment from coastal area of Weihai; China	sediment	37.4833	121.95	GCF_002806945.1	Han et al. 2017
32	V	adhaerens	﻿Thalassiosira weissflogii diatom aggregates; Wadden sea surface; Germany	protist-host	53.57	6.95	GCF_000166295.1	Gärdes et al. 2010; Kaeppel et al. 2012
33	V	flavimaris	﻿seawater; Daepo Beach; Yellow Sea; Korea	seawater	33.2	126.4	GCF_003363485.1	Yoon et al. 2004
34	V	gudaonensis	﻿oil-polluted soil underlying wastewater from the coastal Shengli Oil field; China	pollution	37.8833	118.833	GCF_900115175.1	Gu et al. 2007
35	V	guineae	﻿marine sediment; Deception Island; Antarctica	sediment	-63	-60.5	GCF_002744735.1	Montes et al. 2008
36	V	manganoxydans	deep sea hydrothermal vent; Indian Ocean	hydrothermal vent	-25.32	70.04	GCF_000235625.1	Wang et al. 2012
37	V	salsuginis	﻿brine-seawater interface; Shaban Deep (a brine-filled deep); Red Sea	deep sea brine seep	26.2167	35.3667	GCF_009617755.1	Antunes et al. 2007
38	V	subterrani	iron mine borehole; 714 m depth; Soudan Iron Mine; Minnesota, USA	deep subsurface	47.82	-92.24	GCF_001045555.1	Bonis and Gralnick 2015
39	VI	nitratireducens	seawater sample collected from Visakhapatnam, India	seawater	17.7817	83.3862	GCF_000708045.1	Vaidya et al. 2015
40	VI	salinus	tidal flat sediment; Gunsan, South Korea	sediment	36	126.717	GCF_001854125.1	Rani et al. 2017a,b
41	VI	similis	seawater; Australia	seawater	-38.1694	144.863	GCF_000830985.1	Ivanova et al. 2014; Ng et al. 2014
42	VII	daepoensis	seawater; Daepo Beach; Yellow Sea; Korea	seawater	33.2	126.4	GCF_000421165.1	Yoon et al. 2004
43	VII	excellens	﻿radionuclide-polluted sediment; 0.5m depth; Chazhma Bay; Sea of Japan; Russia	pollution	42.9026	132.353	GCF_000934705.1	Gorshkova et al. 2003
44	VII	fuscus	seawater; South China Sea; China	seawater	15	114	GCF_003007675.1	Liu et al. 2018
45	VII	halophilus	moderately saline water; Xiaochaidan Lake, China	saline lake	37.4814	95.5053	GCF_003007685.1	Zhong et al. 2015
46	VII	hydrocarbonoclasticus	﻿oil-polluted sediment; Gulf of Fos; Mediterranean coast; France	pollution	43.4014	4.9276	GCF_000284615.1	Gauthier et al. 1992; Grimaud et al. 2012
47	VII	litoralis	seawater; Jungdongjin beach; East Sea; Korea	seawater	39.4	134.4	GCF_003336705.1	Yoon et al. 2003; Musa et al. 2019
48	VII	persicus	saline lake; Aran-Bidgol, Iran	saline lake	34.4	51.7	GCF_900114155.1	Bagheri et al. 2013
49	VII	shengliensis	oil and salt contaminated soil; Shengli Oilfield, China	pollution	37.8833	118.833	GCF_003007715.1	Luo et al. 2015
50	VII	vinifirmus	wine tank decalcification wastewater-evaporation pond	saltern	43.3058	5.3949	GCF_002258215.1	Liebgott et al. 2006
51	VIII	lutaoensis	coastal hot spring water; Lutao; Taiwan	hot spring	22.6366	121.504	GCF_001981305.1	Shieh et al. 2003
52	VIII	pelagius	coastal seawater; Zhoushan Archipelago; China	seawater	30.34	122.36	GCF_900114925.1	Xu et al. 2008
53	VIII	santoriniensis	ferruginous hydrothermal marine sediment; Santorini; Greece	hydrothermal vent	36.42	25.42	GCF_000347775.1	Handley et al. 2013
		^1 Whole genomes of isolates derived from CBIW_18 described by Cooper et al., 2019
		^2 MAGs generated from samples corresponding to their names described by Cooper et al., 2019
	References
	Antunes, A., Francça, L., Rainey, F. A., Huber, R., Fernanda Nobre, M., Edwards, K. J., et al. (2007). Marinobacter salsuginis sp. nov., isolated from the brine-seawater interface of the Shaban Deep, Red Sea. Int. J. Syst. Evol. Microbiol. 57, 1035–1040. doi:10.1099/ijs.0.64862-0.
	Bagheri, M., Amoozegar, M. A., Didari, M., Makhdoumi-Kakhki, A., Schumann, P., Spröer, C., et al. (2013). Marinobacter persicus sp. nov., a moderately halophilic bacterium from a saline lake in Iran. Antonie van Leeuwenhoek, Int. J. Gen. Mol. Microbiol. 104, 47–54. doi:10.1007/s10482-013-9923-3.
	Bonis, B. M., and Gralnick, J. A. (2015). Marinobacter subterrani, a genetically tractable neutrophilic Fe(II)-oxidizing strain isolated from the Soudan Iron Mine. Front. Microbiol. 6, 719. doi:10.3389/fmicb.2015.00719.
	Cao, J., Liu, P., Liu, R., Su, H., Wei, Y., Liu, R., et al. (2019). Marinobacter profundi sp. nov., a slightly halophilic bacterium isolated from a deep-sea sediment sample of the New Britain Trench. Antonie van Leeuwenhoek, Int. J. Gen. Mol. Microbiol. 112, 425–434. doi:10.1007/s10482-018-1176-8.
	Chua, M. J., Campen, R. L., Wahl, L., Grzymski, J. J., and Mikucki, J. A. (2018). Genomic and physiological characterization and description of Marinobacter gelidimuriae sp. nov., a psychrophilic, moderate halophile from Blood Falls, an antarctic subglacial brine. FEMS Microbiol. Ecol. 94, 1–15. doi:10.1093/femsec/fiy021.
	Cui, Z., Gao, W., Li, Q., Xu, G., and Zheng, L. (2013). Genome sequence of the polycyclic aromatic hydrocarbon-degrading bacterium Marinobacter nanhaiticus strain D15-8WT. Genome Announc. 1. doi:10.1128/genomeA.00301-13.
	Cui, Z., Gao, W., Xu, G., Luan, X., Li, Q., Yin, X., et al. (2016). Marinobacter aromaticivorans sp. nov., a polycyclic aromatic hydrocarbon-degrading bacterium isolated from sea sediment. Int. J. Syst. Evol. Microbiol. 66, 353–359. doi:10.1099/ijsem.0.000722.
	Gao, W., Cui, Z., Li, Q., Xu, G., Jia, X., and Zheng, L. (2013). Marinobacter nanhaiticus sp. nov., polycyclic aromatic hydrocarbon- degrading bacterium isolated from the sediment of the South China Sea. Antonie van Leeuwenhoek, Int. J. Gen. Mol. Microbiol. 103, 485–491. doi:10.1007/s10482-012-9830-z.
	Gärdes, A., Kaeppel, E., Shehzad, A., Seebah, S., Teeling, H., Yarza, P., et al. (2010). Complete genome sequence of Marinobacter adhaerens type strain (HP15), a diatom-interacting marine microorganism. Stand. Genomic Sci. 3, 97–107. doi:10.4056/sigs.922139.
	Gauthier, M. J., Lafay, B., Christen, R., Fernandez, L., Acquaviva, M., Bonin, P., et al. (1992). Marinobacter hydrocarbonoclasticus gen. nov., sp. nov., a new, extremely halotolerant, hydrocarbon-degrading marine bacterium. Int. J. Syst. Bacteriol. 42, 568–576. doi:10.1099/00207713-42-4-568.
	Gorshkova, N. M., Ivanova, E. P., Sergeev, A. F., Zhukova, N. V., Alexeeva, Y., Wright, J. P., et al. (2003). Marinobacter excellens sp. nov., isolated from sediments of the Sea of Japan. Int. J. Syst. Evol. Microbiol. 53, 2073–2078. doi:10.1099/ijs.0.02693-0.
	Green, D. H., Bowman, J. P., Smith, E. A., Gutierrez, T., and Bolch, C. J. S. (2006). Marinobacter algicola sp. nov., isolated from laboratory cultures of paralytic shellfish toxin-producing dinoflagellates. Int. J. Syst. Evol. Microbiol. 56, 523–527. doi:10.1099/ijs.0.63447-0.
	Grimaud, R., Ghiglione, J. F., Cagnon, C., Lauga, B., Vaysse, P. J., Rodriguez-Blanco, A., et al. (2012). Genome sequence of the marine bacterium Marinobacter hydrocarbonoclasticus SP17, which forms biofilms on hydrophobic organic compounds. J. Bacteriol. 194, 3539–3540. doi:10.1128/JB.00500-12.
	Gu, J., Cai, H., Yu, S. L., Qu, R., Yin, B., Guo, Y. F., et al. (2007). Marinobacter gudaonensis sp. nov., isolated from an oil-polluted saline soil in a Chinese oilfield. Int. J. Syst. Evol. Microbiol. 57, 250–254. doi:10.1099/ijs.0.64522-0.
	Guo, B., Gu, J., Ye, Y. G., Tang, Y. Q., Kida, K., and Wu, X. L. (2007). Marinobacter segnicrescens sp. nov., a moderate halophile isolated from benthic sediment of the South China Sea. Int. J. Syst. Evol. Microbiol. 57, 1970–1974. doi:10.1099/ijs.0.65030-0.
	Han, J. R., Ling, S. K., Yu, W. N., Chen, G. J., and Du, Z. J. (2017). Marinobacter salexigens sp. nov., isolated from marine sediment. Int. J. Syst. Evol. Microbiol. 67, 4595–4600. doi:10.1099/ijsem.0.002337.
	Handley, K. M., Héry, M., and Lloyd, J. R. (2009). Marinobacter santoriniensis sp. nov., an arsenaterespiring and arsenite-oxidizing bacterium isolated from hydrothermal sediment. Int. J. Syst. Evol. Microbiol. 59, 886–892. doi:10.1099/ijs.0.003145-0.
	Hedi, A., Cayol, J. L., Sadfi, N., and Fardeau, M. L. (2015). Marinobacter piscensis sp. nov., a Moderately Halophilic Bacterium Isolated from Salty Food in Tunisia. Curr. Microbiol. 70, 544–549. doi:10.1007/s00284-014-0754-x.
	Huo, Y. Y., Wang, C. S., Yang, J. Y., Wu, M., and Xu, X. W. (2008). Marinobacter mobilis sp. nov. and Marinobacter zhejiangensis sp. nov., halophilic bacteria isolated from the East China Sea. Int. J. Syst. Evol. Microbiol. 58, 2885–2889. doi:10.1099/ijs.0.2008/000786-0.
	Ivanova, E. P., Ng, H. J., Webb, H. K., Feng, G., Oshima, K., Hattori, M., et al. (2014). Draft genome sequences of Marinobacter similis A3d10T and Marinobacter salarius R9SW1T. Genome Announc. 2, 442–456. doi:10.1128/genomeA.00442-14.
	Kaeppel, E. C., Gärdes, A., Seebah, S., Grossart, H. P., and Ullrich, M. S. (2011). Marinobacter adhaerens sp. nov., isolated from marine aggregates formed with the diatom Thalassiosira weissflogii. Int. J. Syst. Evol. Microbiol. 62, 124–128. doi:10.1099/ijs.0.030189-0.
	Kim, J. O., Lee, H. J., Han, S. I., and Whang, K. S. (2017). Marinobacter halotolerans sp. Nov., a halophilic bacterium isolated from a saltern crystallizing pond. Int. J. Syst. Evol. Microbiol. 67, 460–465. doi:10.1099/ijsem.0.001653.
	Li, G., Wang, S., Gai, Y., Liu, X., Lai, Q., and Shao, Z. (2020). Marinobacter changyiensis, sp. Nov., isolated from offshore sediment. Int. J. Syst. Evol. Microbiol. 70, 3004–3011. doi:10.1099/ijsem.0.004118.
	Liebgott, P. P., Casalot, L., Paillard, S., Lorquin, J., and Labat, M. (2006). Marinobacter vinifirmus sp. nov., a moderately halophilic bacterium isolated from a wine-barrel-decalcification wastewater. Int. J. Syst. Evol. Microbiol. 56, 2511–2516. doi:10.1099/ijs.0.64368-0.
	Liu, C., Chen, C. X., Zhang, X. Y., Yu, Y., Liu, A., Li, G. W., et al. (2012). Marinobacter antarcticus sp. nov., a halotolerant bacterium isolated from Antarctic intertidal sandy sediment. Int. J. Syst. Evol. Microbiol. 62, 1838–1844. doi:10.1099/ijs.0.035774-0.
	Liu, Q., Xamxidin, M., Sun, C., Cheng, H., Meng, F. X., Wu, Y. H., et al. (2018). Marinobacter fuscus sp. Nov., a marine bacterium of gammaproteobacteria isolated from surface seawater. Int. J. Syst. Evol. Microbiol. 68, 3156–3162. doi:10.1099/ijsem.0.002956.
	Luo, Y. J., Xie, B. S., Lv, X. L., Cai, M., Wang, Y. N., Cui, H. L., et al. (2015). Marinobacter shengliensis sp. nov., a moderately halophilic bacterium isolated from oil-contaminated saline soil. Antonie van Leeuwenhoek, Int. J. Gen. Mol. Microbiol. 107, 1085–1094. doi:10.1007/s10482-015-0401-y.
	Montes, M. J., Bozal, N., and Mercadé, E. (2008). Marinobacter guineae sp. nov., a novel moderately halophilic bacterium from an Antarctic environment. Int. J. Syst. Evol. Microbiol. 58, 1346–1349. doi:10.1099/ijs.0.65298-0.
	Musa, H., Kasim, F. H., Gunny, A. A. N., Gopinath, S. C. B., Chinni, S. V., and Ahmad, M. A. (2019). Whole genome sequence of moderate halophilic marine bacterium Marinobacter litoralis SW-45: Abundance of non-coding RNAs. Int. J. Biol. Macromol. 133, 1288–1298. doi:10.1016/j.ijbiomac.2019.05.003.
	Ng, H. J., López-Pérez, M., Webb, H. K., Gomez, D., Sawabe, T., Ryan, J., et al. (2014). Marinobacter salarius sp. nov. and Marinobacter similis sp. nov., Isolated from Sea Water. PLoS One 9, e106514. doi:10.1371/journal.pone.0106514.
	Papke, R. T., de la Haba, R. R., Infante-Domínguez, C., Pérez, D., Sánchez-Porro, C., Lapierre, P., et al. (2013). Draft genome sequence of the moderately halophilic bacterium Marinobacter lipolyticus strain SM19. Genome Announc. 1. doi:10.1128/genomeA.00379-13.
	Park, S., Kim, S., Kang, C. H., Jung, Y. T., and Yoon, J. H. (2015). Marinobacter confluentis sp. Nov, a lipolytic bacterium isolated from a junction between the ocean and a freshwater lake. Int. J. Syst. Evol. Microbiol. 65, 4873–4879. doi:10.1099/ijsem.0.000659.
	Qu, L., Zhu, F., Zhang, I., Gao, C., and Sun, X. (2011). Marinobacter daqiaonensis sp. nov., a moderate halophile isolated from a yellow sea salt pond. Int. J. Syst. Evol. Microbiol. 61, 3003–3008. doi:10.1099/ijs.0.028993-0.
	Rani, S., Jeon, W. J., Koh, H. W., Kim, Y. E., Kang, M. S., and Park, S. J. (2017). Genomic potential of Marinobacter salinus Hb8T as sulfur oxidizing and aromatic hydrocarbon degrading bacterium. Mar. Genomics 34, 19–21. doi:10.1016/j.margen.2017.02.005.
	Rani, S., Koh, H. W., Kim, H., Rhee, S. K., and Park, S. J. (2017). Marinobacter salinus sp. Nov., a moderately halophilic bacterium isolated from a tidal flat environment. Int. J. Syst. Evol. Microbiol. 67, 205–211. doi:10.1099/ijsem.0.001587.
	Shieh, W. Y., Jean, W. D., Lin, Y. Te, and Tseng, M. (2003). Marinobacter lutaoensis sp. nov., a thermotolerant marine bacterium isolated from a coastal hot spring in Lutao, Taiwan. Can. J. Microbiol. 49, 244–252. doi:10.1139/w03-032.
	Shivaji, S., Gupta, P., Chaturvedi, P., Suresh, K., and Delille, D. (2005). Marinobacter maritimus sp. nov., a psychrotolerant strain isolated from sea water off the subantarctic Kerguelen islands. Int. J. Syst. Evol. Microbiol. 55, 1453–1456. doi:10.1099/ijs.0.63478-0.
	Sun, Q.-L., Sun, Y.-L., Sun, Y.-Y., Luan, Z.-D., and Lian, C. (2020). Marinobacter fonticola sp. nov., isolated from deep sea cold seep sediment. Int. J. Syst. Evol. Microbiol 70, 1172–1177. doi:10.1099/ijsem.0.003895.
	Vaidya, B., Kumar, R., Korpole, S., Pinnaka, A. K., and Tanuku, N. R. S. (2015). Marinobacter nitratireducens sp. nov., a halophilic and lipolytic bacterium isolated from coastal surface sea water. Int. J. Syst. Evol. Microbiol. 65, 2056–2063. doi:10.1099/ijs.0.000218.
	Wang, H., Li, H., Shao, Z., Liao, S., Johnstone, L., Rensing, C., et al. (2012). Genome sequence of deep-sea manganese-oxidizing bacterium Marinobacter manganoxydans MnI7-9. J. Bacteriol. 194, 899–900. doi:10.1128/JB.06551-11.
	Xu, S., Wang, D., Wei, Y., Cui, Q., and Li, W. (2018). Marinobacter bohaiensis sp. nov., a moderate halophile isolated from benthic sediment of the Bohai Sea. Int. J. Syst. Evol. Microbiol. 68, 3534–3539. doi:10.1099/ijsem.0.003025.
	Xu, X. W., Wu, Y. H., Wang, C. S., Yang, J. Y., Oren, A., and Wu, M. (2008). Marinobacter pelagius sp. nov., a moderately halophilic bacterium. Int. J. Syst. Evol. Microbiol. 58, 637–640. doi:10.1099/ijs.0.65390-0.
	Yoon, J. H., Lee, M. H., Kang, S. J., and Oh, T. K. (2007). Marinobacter salicampi sp. nov., isolated from a marine solar saltern in Korea. Int. J. Syst. Evol. Microbiol. 57, 2102–2105. doi:10.1099/ijs.0.65197-0.
	Yoon, J. H., Shin, D. Y., Kim, I. G., Kang, K. H., and Park, Y. H. (2003). Marinobacter litoralis sp. nov., a moderately halophilic bacterium isolated from sea water from the East Sea in Korea. Int. J. Syst. Evol. Microbiol. 53, 563–568. doi:10.1099/ijs.0.02363-0.
	Yoon, J. H., Yeo, S. H., kim, I. G., and Oh, T. K. (2004). Marinobacter flavimaris sp. nov. and Marinobacter daepoensis sp. nov., slightly halophilic organisms isolated from sea water of the Yellow Sea in Korea. Int. J. Syst. Evol. Microbiol. 54, 1799–1803. doi:10.1099/ijs.0.63151-0.
	Zhang, D. C., Li, H. R., Xin, Y. H., Chi, Z. M., Zhou, P. J., and Yu, Y. (2008). Marinobacter psychrophilus sp. nov., a psychrophilic bacterium isolated from the Arctic. Int. J. Syst. Evol. Microbiol. 58, 1463–1466. doi:10.1099/ijs.0.65690-0.
	Zhang, Y., Zhong, X. C., Xu, W., Lu, D. C., Zhao, J. X., and Du, Z. J. (2020). Marinobacter vulgaris sp. Nov., a moderately halophilic bacterium isolated from a marine solar saltern. Int. J. Syst. Evol. Microbiol. 70, 450–456. doi:10.1099/ijsem.0.003774.
	Zhong, Z. P., Liu, Y., Liu, H. C., Wang, F., Zhou, Y. G., and Liu, Z. P. (2015). Marinobacter halophilus sp. nov., a halophilic bacterium isolated from a salt lake. Int. J. Syst. Evol. Microbiol. 65, 2838–2845. doi:10.1099/ijs.0.000338.
